# Supplementary material for: Preclinical characterization of MTX-101: a novel bispecific CD8 Treg modulator that restores CD8 Treg functions to suppress pathogenic T cells in autoimmune diseases
Source: PubMed Central journal article supplement (PMC11570885; doi:10.3389/fimmu.2024.1452537), 2024-11-04
Supplement: Image3.pdf [file Image3.pdf]

A.

CD8 Treg killing of  
gliadin TCR transduced SKW targets

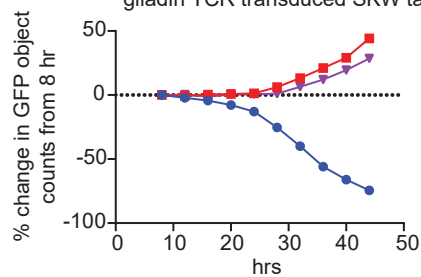

- CD8 Treg enriched with gliadin TCR transduced SKW targets
- Non-CD8 Tregs with gliadin TCR transduced SKW targets
- ▲ Gliadin TCR transduced SKW targets only

B.

CD8 Treg enriched with activated gliadin TCR transduced SKW targets

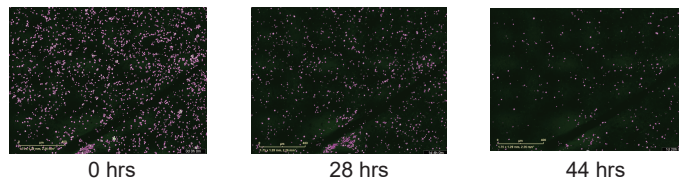

0 hrs

28 hrs

44 hrs

C.

Non-CD8 Tregs with activated gliadin TCR transduced SKW

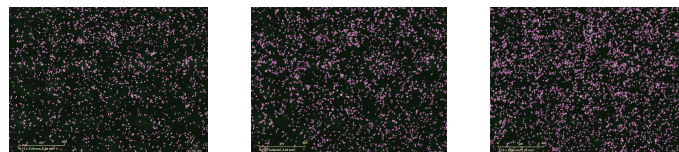

0 hrs

28 hrs

44 hrs
