# Supplementary material for: Preclinical characterization of MTX-101: a novel bispecific CD8 Treg modulator that restores CD8 Treg functions to suppress pathogenic T cells in autoimmune diseases
Source: PubMed Central journal article supplement (PMC11570885; doi:10.3389/fimmu.2024.1452537), 2024-11-04
Supplement: Image4.pdf [file Image4.pdf]

A.

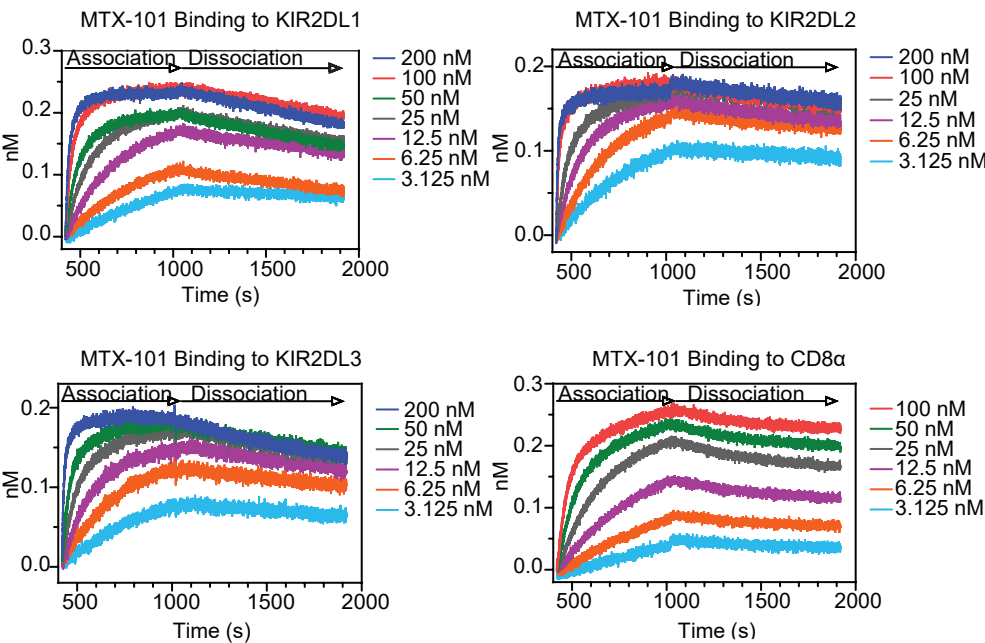

B.

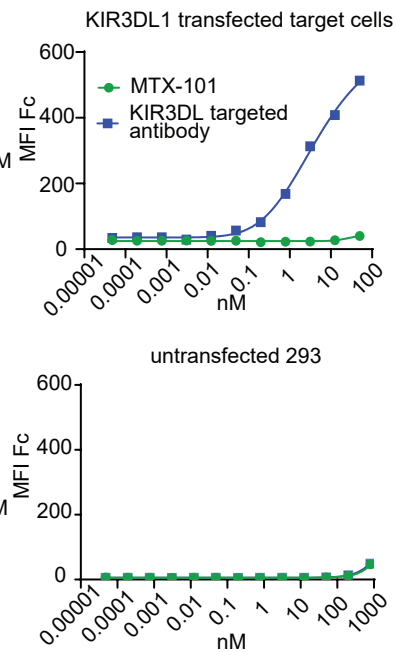

C.

| Screen Results- fixed       | KIR2DS2    | KIR2DS3 | KIR2DS1  | KIR2DL2 | KIR2DL3  | KIR2DL1  | KIR2DS2 | KIR2DL1 | CD8A       | CD8A     | FZD5   |
|-----------------------------|------------|---------|----------|---------|----------|----------|---------|---------|------------|----------|--------|
| Sample ID (Concentration)   | 246        | 1006    | 1058     | 927     | 2240     | 1942     | 3468    | 3402    | 4948       | 5802     | 1819   |
| MTX-101 (20 $\mu$ g/mL)     | med/strong | weak    | strong   | strong  | strong   | strong   | strong  | strong  | med/strong | medium   | v weak |
| MTX-101 (20 $\mu$ g/mL)     | med/strong | weak    | strong   | strong  | strong   | strong   | strong  | strong  | medium     | medium   | v weak |
| KIR FAB Fc (20 $\mu$ g/mL)  | med/strong | weak    | strong   | strong  | strong   | strong   | strong  | strong  | neg        | neg      | v weak |
| KIR FAB Fc (20 $\mu$ g/mL)  | med/strong | weak    | strong   | strong  | strong   | strong   | strong  | strong  | neg        | neg      | v weak |
| CD8 scFv Fc (20 $\mu$ g/mL) | neg        | neg     | neg      | neg     | neg      | neg      | neg     | neg     | medium     | weak     | neg    |
| CD8 scFv Fc (20 $\mu$ g/mL) | neg        | neg     | neg      | neg     | neg      | neg      | neg     | neg     | medium     | weak/med | neg    |
| Screen Results- unfixed     | KIR2DS2    | KIR2DS3 | KIR2DS1  | KIR2DL2 | KIR2DL3  | KIR2DL1  | KIR2DS2 | KIR2DL1 | CD8A       | CD8A     | FZD5   |
| MTX-101 (20 $\mu$ g/mL)     | weak/med   | v weak  | medium   | medium  | medium   | weak/med | medium  | strong  | med/strong | v weak   | weak   |
| KIR FAB Fc (20 $\mu$ g/mL)  | weak/med   | v weak  | weak/med | medium  | weak/med | weak     | medium  | strong  | neg        | neg      | weak   |
| CD8 scFv Fc (20 $\mu$ g/mL) | neg        | neg     | neg      | neg     | neg      | neg      | neg     | neg     | med/strong | v weak   | neg    |
